# Supplementary material for: How Varroa Parasitism Affects the Immunological and Nutritional Status of the Honey Bee, Apis mellifera
Source: PubMed Central journal article supplement (PMC4553578; doi:10.3390/insects3030601), 2012-06-27
Supplement: insects-03-00601-s001.pdf [file insects-03-00601-s001.pdf]

## Supplementary Materials

**Table S1.** Statistical analysis of DWV titers and gene expression levels. The fold difference in RNA of interest between *Varroa*-infested and uninfested bees was  $\log_2$ -transformed and compared to the null hypothesis of  $\log_2$  (fold difference) = 0 (no difference) by t-test, with Bonferroni correction for four tests for each gene. For this analysis, samples from all colonies were pooled, following confirmation of no significant among-colony variation ( $p > 0.05$ ): August pupae,  $n = 15$ ; August newly emerged bees,  $n = 12$ ; September pupae,  $n = 12$ ; September newly-emerged adults,  $n = 9$ . NS – not significant, \*  $0.0125 > p > 0.001$ ; \*\*  $p < 0.001$

### (a) DWV titer

| Sample              | t      | p  |
|---------------------|--------|----|
| August pupae        | 7.306  | ** |
| August hive bees    | 8.670  | ** |
| September pupae     | 6.799  | ** |
| September hive bees | 11.983 | ** |

### (b) hexamerin

| Sample              | T      | p  |
|---------------------|--------|----|
| August pupae        | 0.789  | NS |
| August hive bees    | 2.321  | NS |
| September pupae     | 1.4628 | NS |
| September hive bees | 1.328  | NS |

### (c) vitellogenin

| Sample              | T      | p  |
|---------------------|--------|----|
| August pupae        | 2.947  | NS |
| August hive bees    | 4.309  | *  |
| September pupae     | 1.5739 | NS |
| September hive bees | 0.919  | NS |

### (d) hymenoptaecin

| Sample              | T      | p  |
|---------------------|--------|----|
| August pupae        | 1.365  | NS |
| August hive bees    | 4.877  | ** |
| September pupae     | 11.152 | ** |
| September hive bees | 6.146  | ** |

### (e) defensin

| Sample              | T      | p  |
|---------------------|--------|----|
| August pupae        | 0.495  | NS |
| August hive bees    | 3.366  | *  |
| September pupae     | 10.481 | ** |
| September hive bees | 1.109  | NS |

**Table S1. Cont.**

(f) abaecin

| Sample              | T     | p  |
|---------------------|-------|----|
| August pupae        | 1.763 | NS |
| August hive bees    | 4.119 | *  |
| September pupae     | 7.627 | ** |
| September hive bees | 5.310 | ** |

**Table S2.** Statistical analysis of the nutritional indices and metabolites in pupae and hive bees (Vbee=uninfested vs *Varroa*-infested insect; Vcolony=*Varroa* prevalence above or below the treatment threshold; colony(Vcolony)=colony nested within Vcolony. The critical probability for indices quantified for both pupae and hive bees is 0.025, following Bonferroni correction for two tests. [\* p<0.05 or <0.025; \*\* p<0.01; \*\*\* p<0.001].

a. Weight

| Source of variance   | df | Pupae <sup>1</sup> | Hive bees <sup>2</sup> |
|----------------------|----|--------------------|------------------------|
| Vbee                 | 1  | 53.38***           | 73.92***               |
| Vcolony              | 1  | 102.47***          | 3.32                   |
| Colony(Vcolony)      | 4  | 31.15***           | 6.56***                |
| Vbee x Vcolony       | 1  | 0.09               | 1.06                   |
| Vbee*colony(Vcolony) | 4  | 3.69               | 1.47                   |

<sup>1</sup> error df =124; <sup>2</sup> error df = 132

b. Protein density

| Source of variance   | df | Pupae <sup>1</sup> | Hive bees <sup>2</sup> |
|----------------------|----|--------------------|------------------------|
| Vbee                 | 1  | 46.47***           | 47.50***               |
| Vcolony              | 1  | 1.06               | 3.08                   |
| Colony(Vcolony)      | 4  | 33.94***           | 4.81**                 |
| Vbee x Vcolony       | 1  | 0.03               | 0.05                   |
| Vbee*colony(Vcolony) | 4  | 11.74***           | 0.41                   |

<sup>1</sup> error df =124; <sup>2</sup> error df = 132

c. Triglyceride density

| Source of variance   | df | Pupae <sup>1</sup> | Hive bees <sup>2</sup> |
|----------------------|----|--------------------|------------------------|
| Vbee                 | 1  | 5.78**             | 7.55**                 |
| Vcolony              | 1  | 23.68***           | 2.33                   |
| Colony(Vcolony)      | 4  | 3.93**             | 3.23*                  |
| Vbee x Vcolony       | 1  | 69.44***           | 6.59*                  |
| Vbee*colony(Vcolony) | 4  | 5.11**             | 1.50                   |

<sup>1</sup> error df =124; <sup>2</sup> error df = 125

**Table S2. Cont.**

## d. Glycogen density

| Source of variance   | df | Pupae <sup>1</sup> | Hive bees <sup>2</sup> |
|----------------------|----|--------------------|------------------------|
| Vbee                 | 1  | 14.85***           | 2.05                   |
| Vcolony              | 1  | 1.09               | 3.36                   |
| Colony(Vcolony)      | 4  | 23.21***           | 2.87*                  |
| Vbee x Vcolony       | 1  | 2.48               | 2.63                   |
| Vbee*colony(Vcolony) | 4  | 21.49***           | 3.02*                  |

<sup>1</sup> error df =124; <sup>2</sup> error df = 132

## e. Glucose content

| Source of variance   | df | Pupae <sup>1</sup> |
|----------------------|----|--------------------|
| Vbee                 | 1  | 6.75*              |
| Vcolony              | 1  | 89.37***           |
| Colony(Vcolony)      | 4  | 14.57***           |
| Vbee x Vcolony       | 1  | 3.76               |
| Vbee*colony(Vcolony) | 4  | 4.44**             |

<sup>1</sup> error df =121

## f. Trehalose content

| Source of variance   | Df | Pupae <sup>1</sup> |
|----------------------|----|--------------------|
| Vbee                 | 1  | 58.00***           |
| Vcolony              | 1  | 19.86***           |
| Colony(Vcolony)      | 4  | 3.29*              |
| Vbee x Vcolony       | 1  | 3.69               |
| Vbee*colony(Vcolony) | 4  | 1.13               |

<sup>1</sup> error df =121

## g. Free amino acid content

| Source of variance   | Df | Pupae <sup>1</sup> | Hive bees <sup>2</sup> |
|----------------------|----|--------------------|------------------------|
| Vbee                 | 1  | 13.96***           | 0.13                   |
| Vcolony              | 1  | 6.91**             | 2.74                   |
| Colony(Vcolony)      | 4  | 0.03               | 0.35                   |
| Vbee x Vcolony       | 1  | 3.22               | 0.09                   |
| Vbee*colony(Vcolony) | 4  | 2.14               | 2.45                   |

<sup>1</sup> error df = 102; <sup>2</sup> error df = 108

**Table S3.** Amino acid content of pupae and hive bees from six colonies (#1, #4 etc.)

| Amino acid    | Concentration (nmol mg <sup>-1</sup> weight) |            |            |            |            |            |                                 |            |            |            |            |            |
|---------------|----------------------------------------------|------------|------------|------------|------------|------------|---------------------------------|------------|------------|------------|------------|------------|
|               | Mean ± s.e. (10 replicates)*                 |            |            |            |            |            |                                 |            |            |            |            |            |
|               | Uninfested insects                           |            |            |            |            |            | <i>Varroa</i> -infested insects |            |            |            |            |            |
|               | #1                                           | #4         | #5         | #6         | #7         | #8         | #1                              | #4         | #5         | #6         | #7*        | #8         |
| Pupae         |                                              |            |            |            |            |            |                                 |            |            |            |            |            |
| Alanine       | 934 ± 129                                    | 830 ± 56   | 782 ± 84   | 728 ± 127  | 784 ± 180  | 1148 ± 134 | 1083 ± 92                       | 1165 ± 153 | 1115 ± 94  | 1491 ± 129 | 1822 ± 207 | 2273 ± 561 |
| Arginine      | 517 ± 29                                     | 816 ± 53   | 570 ± 80   | 626 ± 105  | 219 ± 89   | 761 ± 42   | 768 ± 62                        | 992 ± 54   | 958 ± 51   | 1081 ± 109 | 778 ± 71   | 819 ± 94   |
| Aspartate     | 108 ± 10                                     | 96 ± 9     | 96 ± 17    | 84 ± 14    | 81 ± 20    | 66 ± 8     | 38 ± 11                         | 42 ± 5     | 50 ± 8     | 37 ± 6     | 53 ± 5     | 35 ± 4     |
| Asparagine    | 991 ± 59                                     | 739 ± 61   | 645 ± 86   | 628 ± 112  | 887 ± 197  | 988 ± 79   | 878 ± 82                        | 519 ± 57   | 519 ± 36   | 682 ± 107  | 1155 ± 68  | 885 ± 101  |
| Cysteine      | 16 ± 5                                       | 4 ± 1      | 8 ± 2      | 8 ± 1      | 11 ± 3     | 8 ± 2      | 16 ± 3                          | 15 ± 1     | 19 ± 2     | 14 ± 2     | 13 ± 2     | 18 ± 8     |
| Glutamate     | 1101 ± 63                                    | 1105 ± 70  | 1015 ± 126 | 890 ± 151  | 872 ± 191  | 1180 ± 95  | 1115 ± 90                       | 1075 ± 77  | 1147 ± 83  | 1400 ± 168 | 1338 ± 85  | 1292 ± 133 |
| Glutamine     | 2206 ± 170                                   | 1366 ± 93  | 1717 ± 188 | 1468 ± 325 | 2644 ± 670 | 2064 ± 240 | 1828 ± 111                      | 1574 ± 148 | 1646 ± 91  | 2037 ± 223 | 2785 ± 313 | 3380 ± 586 |
| Glycine       | 1644 ± 191                                   | 1118 ± 156 | 1168 ± 218 | 815 ± 168  | 1528 ± 381 | 2030 ± 299 | 1890 ± 212                      | 1061 ± 85  | 1052 ± 54  | 1420 ± 184 | 2973 ± 438 | 2914 ± 333 |
| Histidine     | 310 ± 23                                     | 238 ± 18   | 243 ± 25   | 235 ± 47   | 348 ± 72   | 356 ± 29   | 339 ± 19                        | 238 ± 12   | 258 ± 14   | 349 ± 25   | 545 ± 52   | 424 ± 46   |
| Isoleucine    | 437 ± 58                                     | 577 ± 48   | 520 ± 69   | 462 ± 78   | 416 ± 89   | 540 ± 35   | 526 ± 38                        | 717 ± 51   | 762 ± 45   | 789 ± 80   | 659 ± 37   | 519 ± 63   |
| Leucine       | 708 ± 51                                     | 833 ± 65   | 752 ± 106  | 691 ± 117  | 575 ± 127  | 720 ± 49   | 768 ± 60                        | 1011 ± 68  | 1111 ± 72  | 1179 ± 123 | 851 ± 80   | 695 ± 91   |
| Lysine        | 695 ± 62                                     | 821 ± 83   | 657 ± 118  | 694 ± 133  | 448 ± 103  | 605 ± 51   | 681 ± 83                        | 946 ± 110  | 996 ± 67   | 1126 ± 154 | 477 ± 52   | 718 ± 84   |
| Methionine    | 65 ± 6                                       | 100 ± 10   | 90 ± 14    | 70 ± 10    | 53 ± 10    | 70 ± 7     | 65 ± 5                          | 131 ± 13   | 144 ± 16   | 135 ± 19   | 102 ± 14   | 86 ± 13    |
| Phenylalanine | 283 ± 18                                     | 492 ± 51   | 469 ± 76   | 342 ± 52   | 294 ± 65   | 309 ± 23   | 317 ± 34                        | 601 ± 30   | 682 ± 48   | 586 ± 60   | 452 ± 48   | 284 ± 43   |
| Proline       | 2945 ± 164                                   | 2572 ± 152 | 2384 ± 262 | 2439 ± 430 | 2307 ± 519 | 3032 ± 238 | 2692 ± 211                      | 2199 ± 137 | 2750 ± 194 | 3266 ± 328 | 3770 ± 398 | 3315 ± 393 |
| Serine        | 3002 ± 371                                   | 3127 ± 162 | 3175 ± 347 | 2002 ± 348 | 3177 ± 722 | 3200 ± 229 | 3160 ± 247                      | 2583 ± 266 | 285 ± 228  | 3012 ± 339 | 4269 ± 129 | 3609 ± 387 |
| Threonine     | 191 ± 42                                     | 415 ± 25   | 345 ± 51   | 327 ± 57   | 356 ± 78   | 395 ± 31   | 317 ± 27                        | 481 ± 38   | 468 ± 37   | 517 ± 54   | 466 ± 58   | 447 ± 46   |
| Tryptophan    | 306 ± 37                                     | 363 ± 15   | 349 ± 33   | 299 ± 49   | 303 ± 65   | 352 ± 11   | 351 ± 21                        | 392 ± 12   | 425 ± 18   | 423 ± 27   | 392 ± 47   | 307 ± 36   |
| Tyrosine      | 1695 ± 110                                   | 1884 ± 285 | 1196 ± 212 | 895 ± 136  | 913 ± 257  | 671 ± 55   | 747 ± 64                        | 1351 ± 68  | 1691 ± 189 | 1765 ± 313 | 1937 ± 361 | 616 ± 79   |
| Valine        | 617 ± 43                                     | 572 ± 43   | 529 ± 55   | 457 ± 79   | 527 ± 122  | 673 ± 76   | 641 ± 49                        | 659 ± 48   | 656 ± 40   | 757 ± 62   | 946 ± 82   | 864 ± 95   |

**Table 3. Cont.**

| Newly-emerged adults |            |            |            |            |            |            |            |            |            |            |            |            |
|----------------------|------------|------------|------------|------------|------------|------------|------------|------------|------------|------------|------------|------------|
| Alanine              | 975 ± 183  | 551 ± 185  | 907 ± 58   | 870 ± 89   | 995 ± 81   | 1053 ± 72  | 1080 ± 120 | 846 ± 139  | 946 ± 124  | 1323 ± 146 | 1352 ± 249 | 1212 ± 165 |
| Arginine             | 496 ± 103  | 611 ± 34   | 435 ± 34   | 459 ± 22   | 376 ± 36   | 547 ± 32   | 895 ± 79   | 638 ± 100  | 726 ± 100  | 762 ± 59   | 714 ± 156  | 814 ± 110  |
| Aspartate            | 112 ± 20   | 156 ± 21   | 111 ± 8    | 130 ± 15   | 152 ± 11   | 152 ± 10   | 63 ± 4     | 64 ± 13    | 101 ± 23   | 160 ± 27   | 77 ± 13    | 126 ± 25   |
| Asparagine           | 347 ± 63   | 375 ± 56   | 360 ± 27   | 280 ± 24   | 436 ± 28   | 375 ± 26   | 322 ± 45   | 253 ± 39   | 233 ± 29   | 326 ± 24   | 337 ± 53   | 397 ± 61   |
| Cysteine             | 9 ± 2      | 9 ± 1      | 12 ± 1     | 11 ± 1     | 9 ± 1      | 12 ± 1     | 16 ± 3     | 8 ± 1      | 18 ± 2     | 17 ± 2     | 12 ± 2     | 16 ± 3     |
| Glutamate            | 898 ± 151  | 1216 ± 87  | 1141 ± 53  | 1059 ± 60  | 1001 ± 61  | 1012 ± 25  | 1006 ± 94  | 676 ± 120  | 860 ± 101  | 1151 ± 82  | 757 ± 128  | 927 ± 129  |
| Glutamine            | 2334 ± 451 | 3217 ± 238 | 2161 ± 116 | 2073 ± 176 | 2753 ± 216 | 2637 ± 174 | 2482 ± 295 | 1949 ± 337 | 1937 ± 295 | 2016 ± 139 | 4211 ± 935 | 2289 ± 417 |
| Glycine              | 753 ± 127  | 986 ± 64   | 810 ± 32   | 791 ± 40   | 795 ± 67   | 815 ± 46   | 989 ± 88   | 667 ± 114  | 897 ± 108  | 996 ± 78   | 947 ± 143  | 934 ± 116  |
| Histidine            | 173 ± 28   | 197 ± 13   | 153 ± 14   | 192 ± 14   | 318 ± 24   | 188 ± 12   | 250 ± 22   | 159 ± 21   | 156 ± 19   | 261 ± 17   | 385 ± 64   | 232 ± 30   |
| Isoleucine           | 494 ± 85   | 570 ± 42   | 413 ± 32   | 406 ± 30   | 505 ± 41   | 541 ± 44   | 695 ± 68   | 430 ± 67   | 536 ± 70   | 602 ± 59   | 539 ± 88   | 635 ± 92   |
| Leucine              | 620 ± 108  | 740 ± 56   | 504 ± 45   | 531 ± 41   | 612 ± 70   | 642 ± 61   | 938 ± 97   | 575 ± 92   | 672 ± 97   | 833 ± 81   | 787 ± 165  | 783 ± 124  |
| Lysine               | 884 ± 172  | 898 ± 57   | 788 ± 50   | 747 ± 53   | 718 ± 60   | 857 ± 67   | 940 ± 107  | 545 ± 99   | 815 ± 132  | 902 ± 94   | 797 ± 180  | 936 ± 150  |
| Methionine           | 92 ± 15    | 122 ± 6    | 94 ± 4     | 90 ± 4     | 86 ± 4     | 94 ± 4     | 128 ± 13   | 103 ± 17   | 132 ± 17   | 132 ± 14   | 111 ± 20   | 125 ± 5    |
| Phenylalanine        | 466 ± 74   | 543 ± 25   | 461 ± 30   | 435 ± 27   | 546 ± 36   | 511 ± 43   | 596 ± 50   | 395 ± 55   | 464 ± 50   | 521 ± 34   | 555 ± 64   | 511 ± 62   |
| Proline              | 2269 ± 373 | 2493 ± 160 | 2501 ± 168 | 2336 ± 120 | 3429 ± 258 | 2593 ± 270 | 2678 ± 306 | 1697 ± 301 | 2088 ± 291 | 2657 ± 182 | 2382 ± 331 | 2382 ± 324 |
| Serine               | 4017 ± 683 | 4458 ± 361 | 4796 ± 113 | 4020 ± 255 | 4374 ± 345 | 4515 ± 315 | 4537 ± 484 | 2985 ± 578 | 3687 ± 503 | 4926 ± 651 | 2970 ± 582 | 4563 ± 729 |
| Threonine            | 332 ± 58   | 393 ± 29   | 352 ± 18   | 329 ± 27   | 436 ± 34   | 385 ± 30   | 444 ± 58   | 289 ± 46   | 387 ± 48   | 435 ± 37   | 529 ± 82   | 417 ± 61   |
| Tryptophan           | 289 ± 41   | 311 ± 7    | 281 ± 12   | 263 ± 9    | 297 ± 15   | 318 ± 16   | 366 ± 21   | 257 ± 30   | 315 ± 29   | 336 ± 20   | 328 ± 39   | 336 ± 39   |
| Tyrosine             | 1006 ± 171 | 2115 ± 186 | 2102 ± 189 | 1980 ± 122 | 1783 ± 168 | 2142 ± 126 | 1775 ± 229 | 667 ± 91   | 929 ± 106  | 1094 ± 99  | 1881 ± 273 | 1440 ± 274 |
| Valine               | 538 ± 90   | 711 ± 66   | 407 ± 28   | 496 ± 33   | 634 ± 62   | 537 ± 41   | 689 ± 74   | 470 ± 83   | 458 ± 63   | 604 ± 47   | 723 ± 141  | 565 ± 88   |

\*n = 4
